# Supplementary material
Source: publisher figshare collection journal article supplement (https://asha.figshare.com/articles/dataset/_/21992576)
Supplement: Supplementary file 2 [file 1]

## Supplemental Material S2. Search strategies.

Initial Search: February 2020, Updated Search: June 2020

| Database       | Search Terms                                                                                                                                         |
|----------------|------------------------------------------------------------------------------------------------------------------------------------------------------|
| PubMed         | ((("Telerehabilitation"[Mesh] OR telerehab*)) AND ("Attitude"[Mesh] OR attitude*))                                                                   |
| CINAHL         | S1- ("Attitude of Health Personnel")<br>S2 - ("Telerehabilitation") OR telepractice OR ("Telehealth")<br>S3 - S1 AND S2                              |
| Cochrane       | #1 - telerehabilitation OR telepractice OR teletherapy<br>#2 - attitude OR perception OR view* OR perspective<br>#3 - #1 AND #2                      |
| SCOPUS         | ( TITLE-ABS-<br>KEY ( telerehabilitation OR telepractice OR teletherapy ) AND TITLE-ABS-<br>KEY ( attitude OR perception OR view* OR perspective ) ) |
| Web of Science | TITLE: ((telerehabilitation OR telepractice OR teletherapy)AND (attitude OR perception OR view* OR perspective))                                     |
| NARIC          | Title contains: telerehab*, OR Title contains: teletherapy, OR Title contains: telepractice                                                          |
| Medline        | ((("Telerehabilitation"[Mesh] OR telerehab*)) AND ("Attitude"[Mesh] OR attitude*))                                                                   |
| PsycINFO       | S1 ("Attitude of Health Personnel")<br>S2 ("Telerehabilitation") OR telepractice OR ("Telehealth")<br>S3 S1 AND S2                                   |
